# Supplementary material
Source: PubMed Central journal article supplement (PMC2951641)
Supplement: 97320630004417S1.pdf [file 97320630004417S1.pdf]

Supplementary material:

$$\log(1/EC_{50}) = 0.489(\pm 0.143)\text{ClogP} + 6.069(\pm 0.177)$$

$$n = 11, r = 0.933, r_{cv}^2 = 0.79, s = 0.26, F_{1,9} = 60.19(10.56) \quad (1)$$

$$\log(1/CC_{50}) = -0.104(\pm 0.101)\text{CMR} + 0.282(\pm 0.136)(\text{ClogP})^2 + 3.391(\pm 1.564)$$

$$n = 10, r = 0.935, r_{cv}^2 = 0.71, s = 0.23, F_{2,7} = 24.19(9.55), (\text{ClogP})_{opt} = 0.0 \quad (2)$$

$$\log(1/EC_{50}) = -0.369(\pm 0.347)\text{ClogP} - 0.571(\pm 0.344)\text{CMR} + 15.159(\pm 3.576)$$

$$n = 14, r = 0.905, r_{cv}^2 = 0.72, s = 0.24, F_{2,11} = 24.92(7.20) \quad (3)$$

$$\log(1/EC_{50}) = 0.595(\pm 0.126)\text{ClogP} - 0.165(\pm 0.045)(\text{ClogP})^2 - 0.177(\pm 0.091)\text{CMR} + 9.010(\pm 1.347)$$

$$n = 25, r = 0.910, r_{cv}^2 = 0.65, s = 0.30, F_{3,21} = 33.69(4.87), (\text{ClogP})_{opt} = 1.80 \quad (4)$$

$$\log(1/CC_{50}) = -0.158(\pm 0.087)\text{CMR} + 0.071(\pm 0.021)(\text{ClogP})^2 + 4.664(\pm 1.279)$$

$$n = 23, r = 0.923, r_{cv}^2 = 0.68, s = 0.30, F_{2,20} = 57.52(5.85), (\text{ClogP})_{opt} = 0.0 \quad (5)$$

$$\log(1/EC_{50}) = 0.761(\pm 0.403)E_s + 0.528(\pm 0.423)B_1 + 0.486(\pm 0.357)I_1 + 5.057(\pm 0.544)$$

$$n = 10, r = 0.925, s = 0.200, F_{3,6} = 11.77(9.78), r_{cv}^2 = 0.48 \quad (6)$$

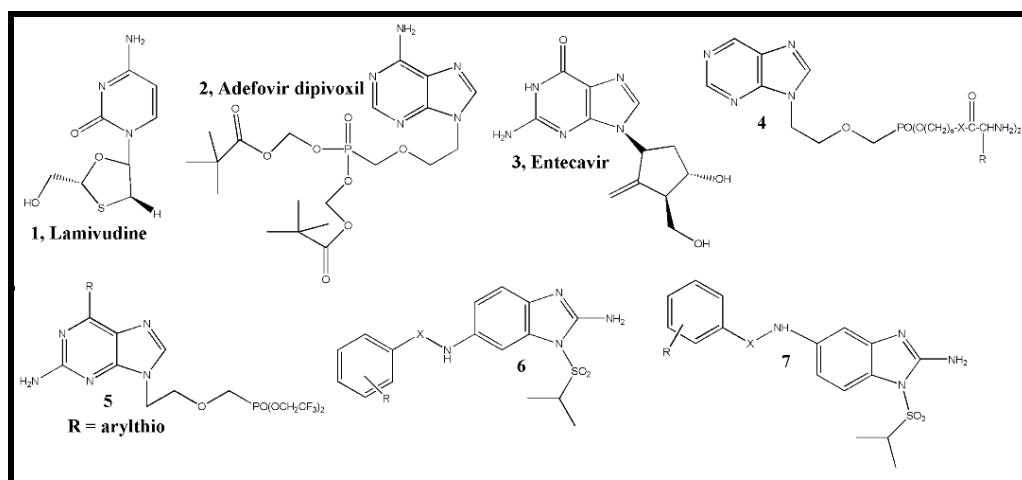

Table 1: Bis (L-amino acid) ester prodrugs of 9-[2-(phosphonomethoxy) ethyl] adenine and their anti-HBV and toxic activities and physicochemical parameters

| Compd | R         | X | n | ClogP | CMR   | log(1/EC <sub>50</sub> ) <sup>a</sup> |             |           | log(1/CC <sub>50</sub> ) <sup>a</sup> |             |           |
|-------|-----------|---|---|-------|-------|---------------------------------------|-------------|-----------|---------------------------------------|-------------|-----------|
|       |           |   |   |       |       | Obsd                                  | Cald, Eq. 1 | Pred, LOO | Obsd                                  | Cald, Eq. 2 | Pred, LOO |
| 4a    | Me        | O | 2 | -1.75 | 11.94 | 4.90                                  | 5.21        | 5.34      | 2.73                                  | 3.01        | 3.15      |
| 4b    | Isopropyl | O | 2 | 0.10  | 13.79 | 5.88                                  | 6.12        | 6.14      | 2.59 <sup>c</sup>                     | 1.96        | -         |
| 4c    | 2-Me-Pr   | O | 2 | 1.16  | 14.72 | 7.02                                  | 6.64        | 6.56      | 2.18                                  | 2.32        | 2.25      |
| 4d    | Bz        | O | 2 | 1.08  | 16.96 | 6.51                                  | 6.60        | 6.61      | 2.59 <sup>c</sup>                     | 1.96        | -         |
| 4e    | H         | S | 2 | -2.16 | 12.14 | 4.99                                  | 5.01        | 5.02      | 3.59                                  | 3.44        | 3.24      |
| 4f    | Me        | S | 2 | -1.54 | 13.24 | 5.81                                  | 5.31        | 5.15      | 2.62                                  | 2.63        | 2.69      |
| 4g    | Isopropyl | S | 2 | 0.31  | 15.10 | 6.12                                  | 6.22        | 6.23      | 1.54                                  | 1.82        | 1.92      |
| 4h    | 2-Me-Pr   | S | 2 | 1.37  | 16.02 | 6.67                                  | 6.74        | 6.75      | 2.47                                  | 2.32        | 2.20      |
| 4i    | Bz        | S | 2 | 1.29  | 18.26 | 6.68                                  | 6.70        | 6.70      | 1.96                                  | 1.93        | 1.98      |
| 4j    | Isopropyl | O | 1 | -0.46 | 12.86 | 6.52 <sup>b</sup>                     | 5.84        | -         | 2.47                                  | 2.10        | 1.90      |
| 4k    | 2-Me-Pr   | O | 1 | 0.59  | 13.79 | 6.47                                  | 6.36        | 6.34      | 2.07                                  | 2.10        | 2.06      |
| 4l    | Bz        | O | 1 | 0.51  | 16.03 | 6.18                                  | 6.32        | 6.33      | 1.81                                  | 1.75        | 1.79      |

<sup>a</sup>Taken from ref [9]. <sup>b</sup>Not included in the derivation of Eq. 1. <sup>c</sup>Not included in the derivation of Eq. 2.

Table 2: 2-Amino-6-arythio-9-[2-(phosphonomethoxy) ethyl]purine bis(2,2,2-trifluoroethyl) esters and their anti-HBV and toxic activities and physicochemical parameters.

| Compd | R         | ClogP | CMR   | log(1/EC <sub>50</sub> ) |            |          | log(1/CC <sub>50</sub> ) |
|-------|-----------|-------|-------|--------------------------|------------|----------|--------------------------|
|       |           |       |       | Obsd <sup>a</sup>        | Cald Eq. 3 | Pred LOO | Obsd <sup>b</sup>        |
| 5a    | SPh       | 2.95  | 11.45 | 7.30                     | 7.54       | 7.62     | NA <sup>b</sup>          |
| 5b    | SPh(4-Me) | 3.45  | 11.91 | 7.22                     | 7.09       | 7.07     | 3.96                     |
| 5c    | SPh(3-Me) | 3.45  | 11.91 | 7.04                     | 7.09       | 7.10     | 3.82                     |
| 5d    | SPh(2-Me) | 3.45  | 11.91 | 7.10                     | 7.09       | 7.09     | 3.47                     |

|    |                           |      |       |                   |      |      |      |
|----|---------------------------|------|-------|-------------------|------|------|------|
| 5e | SPh(4-Et)                 | 3.98 | 12.38 | 6.40              | 6.63 | 6.67 | 3.77 |
| 5f | SPh(4-iPr)                | 4.38 | 12.84 | 6.01              | 6.22 | 6.29 | 3.77 |
| 5g | SPh(4-NO <sub>2</sub> )   | 2.70 | 12.06 | 6.28 <sup>a</sup> | 7.28 | –    | 3.42 |
| 5h | SPh(4-Cl)                 | 3.67 | 11.94 | 6.92              | 6.99 | 7.00 | 4.21 |
| 5i | SPh(4-OMe)                | 2.87 | 12.06 | 7.52              | 7.22 | 7.15 | NA   |
| 5j | SPh(3-OMe)                | 2.87 | 12.06 | 7.40              | 7.22 | 7.19 | NA   |
| 5k | SPh(2-OMe)                | 2.47 | 12.06 | 7.10              | 7.37 | 7.56 | NA   |
| 5l | SPh(4-OEt)                | 3.40 | 12.53 | 6.19 <sup>a</sup> | 6.75 | –    | NA   |
| 5m | SPh(4-O-nPr)              | 3.93 | 12.99 | 6.06              | 6.30 | 6.35 | 3.60 |
| 5n | SPh(4-O-iPr)              | 3.71 | 12.99 | 6.54              | 6.38 | 6.34 | 3.45 |
| 5o | SPh(4-O-nBu)              | 4.46 | 13.46 | NA                | NA   | –    | 3.58 |
| 5p | SPh(4-O-iBu)              | 4.11 | 13.46 | 6.07              | 5.96 | 5.89 | 4.00 |
| 5q | SPh(4-O-CF <sub>3</sub> ) | 3.98 | 12.11 | 7.22              | 6.78 | 6.66 | 3.09 |
| 5r | S-(2-naphthyl)            | 4.13 | 13.14 | 7.04 <sup>c</sup> | 6.13 | –    | 3.70 |

<sup>a</sup>Taken from ref [10]. <sup>b</sup>NA: Not available. <sup>c</sup>Not included in the derivation of Eq. 3.

Table 3: A combine of Tables 1 and 2

| Compd | ClogP | CMR   | log(1/EC <sub>50</sub> ) |      |      | log(1/CC <sub>50</sub> ) |                   |      |
|-------|-------|-------|--------------------------|------|------|--------------------------|-------------------|------|
|       |       |       | Obsd                     | Cald | Pred | Obsd                     | Cald              | Pred |
| 4a    | -1.75 | 11.94 | 4.90                     | 5.35 | 5.53 | 2.73                     | 2.99              | 3.05 |
| 4b    | 0.10  | 13.79 | 5.88 <sup>a</sup>        | 6.63 | –    | 2.59                     | 2.49              | 2.48 |
| 4c    | 1.16  | 14.72 | 7.02                     | 6.87 | 6.66 | 2.18                     | 2.44              | 2.46 |
| 4d    | 1.08  | 16.96 | 6.51                     | 6.45 | 6.45 | 2.59                     | 2.07              | 1.92 |
| 4e    | -2.16 | 12.14 | 4.99                     | 4.81 | 4.66 | 3.59                     | 3.07              | 3.02 |
| 4f    | -1.54 | 13.24 | 5.81                     | 5.36 | 5.23 | 2.62                     | 2.74              | 2.76 |
| 4g    | 0.31  | 15.10 | 6.12                     | 6.50 | 6.54 | 1.54 <sup>c</sup>        | 2.29              | –    |
| 4h    | 1.37  | 16.02 | 6.67                     | 6.68 | 6.68 | 2.47                     | 2.27              | 2.24 |
| 4i    | 1.29  | 18.26 | 6.68                     | 6.27 | 6.03 | 1.96                     | 1.90              | 1.86 |
| 4j    | -0.46 | 12.86 | 6.52                     | 6.42 | 6.40 | 2.47                     | 2.65              | 2.69 |
| 4k    | 0.59  | 13.79 | 6.47                     | 6.86 | 6.91 | 2.07                     | 2.51              | 2.57 |
| 4l    | 0.51  | 16.03 | 6.18                     | 6.43 | 6.46 | 1.81                     | 2.16              | 2.21 |
| 5a    | 2.95  | 11.45 | 7.30                     | 7.30 | 7.31 | NA                       | NA                | NA   |
| 5b    | 3.45  | 11.91 | 7.22                     | 6.99 | 6.98 | 3.96                     | 3.63              | 2.85 |
| 5c    | 3.45  | 11.91 | 7.04                     | 6.99 | 6.99 | 3.82                     | 3.63              | 3.61 |
| 5d    | 3.45  | 11.91 | 7.10                     | 6.99 | 6.98 | 3.47                     | 3.63              | 3.65 |
| 5e    | 3.98  | 12.38 | 6.40                     | 6.58 | 6.59 | 3.77                     | 3.83              | 3.83 |
| 5f    | 4.38  | 12.84 | 6.01                     | 6.18 | 6.25 | 3.77                     | 3.99              | 4.05 |
| 5g    | 2.70  | 12.06 | 6.28 <sup>a</sup>        | 7.29 | –    | 3.42                     | 3.28              | 3.26 |
| 5h    | 3.67  | 11.94 | 6.92                     | 6.86 | 6.85 | 4.21                     | 3.74              | 3.68 |
| 5i    | 2.87  | 12.06 | 7.52                     | 7.22 | 7.19 | NA                       | NA                | NA   |
| 5j    | 2.87  | 12.06 | 7.40                     | 7.22 | 7.20 | NA                       | NA                | NA   |
| 5k    | 2.47  | 12.06 | 7.10                     | 7.34 | 7.38 | NA                       | NA                | NA   |
| 5l    | 3.40  | 12.53 | 6.19 <sup>a</sup>        | 6.90 | –    | NA                       | NA                | NA   |
| 5m    | 3.93  | 12.99 | 6.06                     | 6.51 | 6.58 | 3.60                     | 3.71              | 3.72 |
| 5n    | 3.71  | 12.99 | 6.54                     | 6.65 | 6.29 | 3.45                     | 3.59              | 3.60 |
| 5o    | 4.46  | 13.46 | NA <sup>b</sup>          | NA   | NA   | 3.58                     | 3.95              | 4.04 |
| 5p    | 4.11  | 13.46 | 6.07                     | 6.29 | 6.36 | 4.00                     | 3.74              | 3.71 |
| 5q    | 3.98  | 12.11 | 7.22                     | 6.63 | 6.56 | 3.09                     | 3.88 <sup>c</sup> | –    |
| 5r    | 4.13  | 13.14 | 7.04 <sup>a</sup>        | 6.34 | –    | 3.70                     | 3.80              | 3.82 |

<sup>a</sup>Not included in the derivation of Eq. 4. <sup>b</sup>NA: Not available. <sup>c</sup>Not included in the derivation of Eq. 5.

Table 4: 1-Isopropylsulfonyl-2-amine benzimidazoles and their anti-HBV and toxic activities and physicochemical parameters

| Compd           | X               | R                 | E <sub>s</sub> | B <sub>1</sub> | I <sub>1</sub> | log(1/EC <sub>50</sub> ) |       |      |
|-----------------|-----------------|-------------------|----------------|----------------|----------------|--------------------------|-------|------|
|                 |                 |                   |                |                |                | Obsd <sup>a</sup>        | Calcd | Pred |
| 6a <sup>b</sup> | CO              | H                 | 0.00           | 1.00           | 1.00           | 4.47                     | 6.07  | –    |
| 6b              | CO              | 2-F               | -0.46          | 1.35           | 1.00           | 6.03                     | 5.91  | 5.88 |
| 6c              | CO              | 4-F               | -0.46          | 1.35           | 1.00           | 5.92                     | 5.91  | 5.90 |
| 6d              | CO              | 2,6-DiF           | -0.92          | 2.70           | 1.00           | 6.15                     | 6.27  | 7.53 |
| 6e              | CO              | 2-Cl              | -0.97          | 1.80           | 1.00           | 6.09                     | 5.75  | 5.68 |
| 6f              | CO              | 4-CH <sub>3</sub> | -1.24          | 1.52           | 1.00           | 5.38                     | 5.40  | 5.41 |
| 6g              | SO <sub>2</sub> | H                 | 0.00           | 1.00           | 1.00           | 5.82                     | 6.07  | 6.28 |
| 6h              | SO <sub>2</sub> | 4-CH <sub>3</sub> | -1.24          | 1.52           | 1.00           | 5.32                     | 5.40  | 5.44 |
| 6i <sup>b</sup> | SO <sub>2</sub> | 3-NO <sub>2</sub> | -1.01          | 1.70           | 1.00           | 4.98                     | 5.67  | –    |
| 7a              | CO              | H                 | 0.00           | 1.00           | 0.00           | 5.70                     | 5.85  | 5.47 |
| 7b              | CO              | 4-F               | -0.46          | 1.35           | 0.00           | 5.43                     | 5.42  | 5.41 |

<sup>a</sup>Taken from ref [11]. <sup>b</sup>Not included in the derivation of Eq. 6.
